# Supplementary material for: In vitro and in vivo assessment of novel pH-sensitive interpenetrating polymer networks of a graft copolymer for gastro-protective delivery of ketoprofen
Source: Royal Society of Chemistry journal article supplement (doi:10.1039/c6ra04218j), 2016-01-01
Supplement: c6ra04218j1.pdf [file c6ra04218j1.pdf]

**Supplementary Information for RSC Advances**

***In vitro* and *in vivo* assessment of novel pH-sensitive interpenetrating polymer networks of graft copolymer for gastro-protective delivery of ketoprofen**

Rashmi Boppana<sup>a</sup>, Raghavendra V. Kulkarni<sup>\*,a</sup>, G. Krishna Mohan<sup>b</sup>, Srinivas Mutalik<sup>c</sup>,  
Tejraj M. Aminabhavi<sup>d</sup>

*<sup>a</sup>Department of Pharmaceutical Technology, BLDEA's College of Pharmacy,  
BLDE University Campus, Vijayapur (Bijapur) 586 103, Karnataka, India.*

*E-mail: pharma\_75raghu@yahoo.com*

*<sup>b</sup>Centre for Pharmaceutical Sciences, Jawaharlal Nehru Technological University, Kukatpally,  
Hyderabad 500 585, India*

*<sup>c</sup>Department of Pharmaceutics, Manipal College of Pharmaceutical Sciences,  
Manipal University, Manipal, 576 104, India*

*<sup>d</sup>Soniya Education Trust's College of Pharmacy, Dharwad 580 002, Karnataka, India*

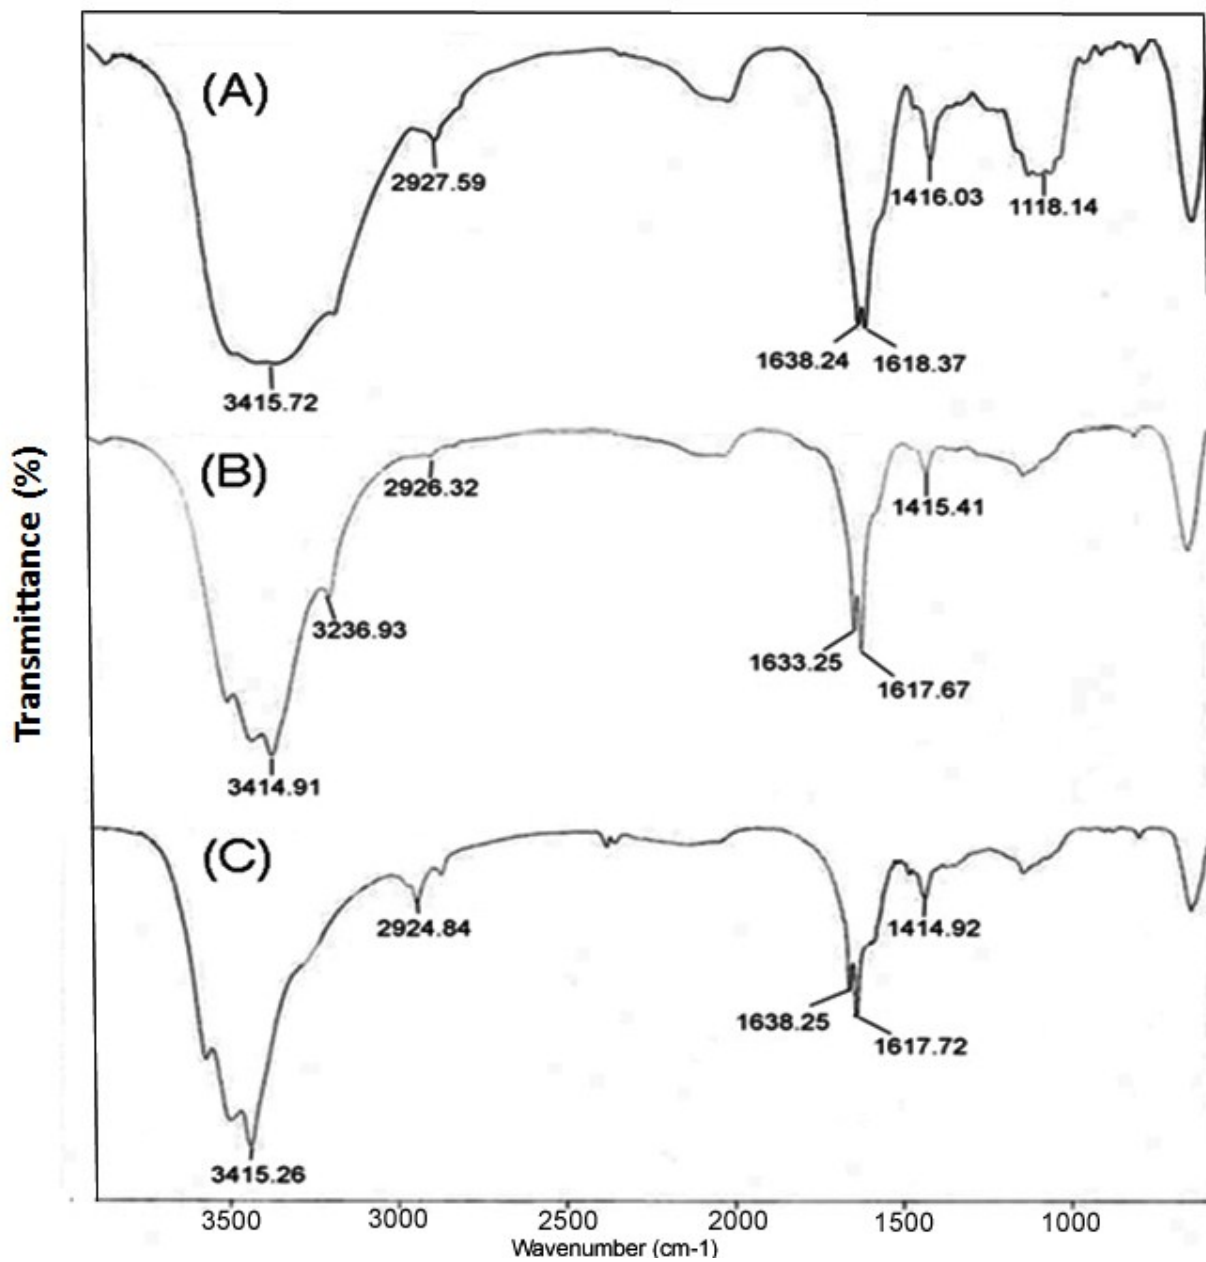

**Fig. S1.** FTIR spectra of TSP (A), PAAm-g-TSP (B) and hydrolyzed PAAm-g-TSP (C)

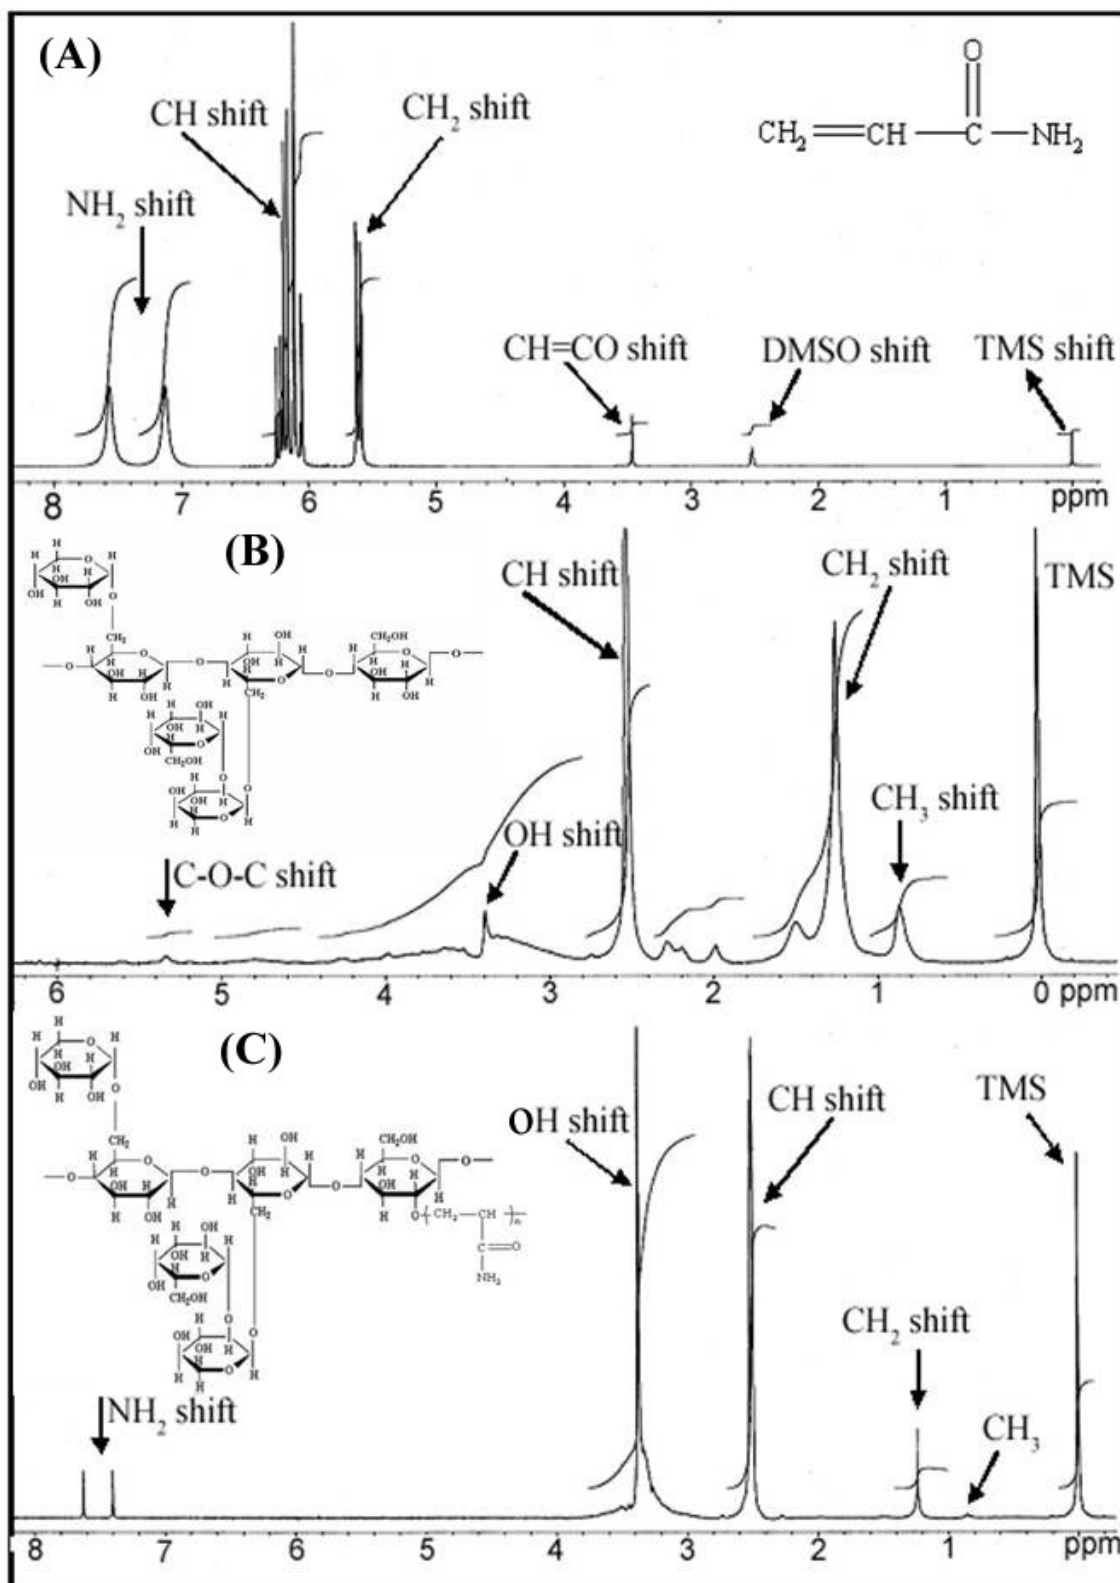

**Fig. S2.**  $^1\text{H-NMR}$  spectra of AAm (A), TSP (B) and PAAm-g-TSP (C)
